# Supplementary material for: Charge Carrier Dynamics in Non-Fullerene Acceptor-Based Organic Solar Cells: Investigating the Influence of Processing Additives Using Transient Absorption Spectroscopy
Source: MDPI journal article supplement (doi:10.3390/ma16165712), 2023-08-21
Supplement: s1 [file s1]

## Supporting Information

**Table S1.** Device performance of PM6:Y6 and PM6:BTP-eC9 with processing additives.

| Photoactive layer | $J_{sc}$ (mA/cm <sup>2</sup> ) | $V_{oc}$ (V) | FF (%) | PCE (%) |
|-------------------|--------------------------------|--------------|--------|---------|
| PM6 : Y6          | 23.980                         | 0.849        | 70.52  | 14.36   |
| PM6:BTP-eC9       | 24.16                          | 0.845        | 73.25  | 14.96   |

**Table S2.** Transient absorption kinetics of PM6:Y6 and PM6:BTP-eC9 blend films including neat films with and without additives probed at 550 nm and at 775 nm, respectively.

| Probe wavelength | Samples      | PM6:Y6         |                     |                |                     | PM6:BTP-eC9    |                     |                |                     |
|------------------|--------------|----------------|---------------------|----------------|---------------------|----------------|---------------------|----------------|---------------------|
|                  |              | A <sub>1</sub> | τ <sub>1</sub> (ns) | A <sub>2</sub> | τ <sub>2</sub> (ns) | A <sub>1</sub> | τ <sub>1</sub> (ns) | A <sub>2</sub> | τ <sub>2</sub> (ns) |
| 550 nm           | neat PM6     | 0.70           | 28                  | 0.23           | 642                 | 0.70           | 28                  | 0.23           | 642                 |
|                  | w/o additive | 0.82           | 46                  | 0.23           | 603                 | 0.77           | 74                  | 0.22           | 762                 |
|                  | w/ additive  | 0.72           | 79                  | 0.20           | 1036                | 0.73           | 123                 | 0.21           | 829                 |
| 775 nm           | neat NFA     | 0.61           | 27                  | 0.25           | 545                 | 0.74           | 21                  | 0.20           | 429                 |
|                  | w/o additive | 0.25           | 141                 | 0.33           | 1543                | 0.73           | 88                  | 0.16           | 765                 |
|                  | w/ additive  | 0.43           | 154                 | 0.37           | 1169                | 0.74           | 140                 | 0.21           | 1725                |

### Fitting Equation for calculating carrier lifetime:

$$I(t) = A_1 \exp\left(-\frac{t-t_0}{\tau_1}\right) + A_2 \exp\left(-\frac{t-t_0}{\tau_2}\right) \quad (1)$$

where, the start time of the decay process is represented by  $t_0$ , while  $\tau_1$  and  $\tau_2$  denote the first and second order decay times, respectively.  $A_1$  and  $A_2$  are weighting coefficients assigned to each decay channel.
